# Supplementary material
Source: ML conference proceedings conference paper supplement (https://proceedings.neurips.cc/paper_files/paper/2019/hash/a0dc078ca0d99b5ebb465a9f1cad54ba-Abstract.html)
Supplement: Supplementary file [file a0dc078ca0d99b5ebb465a9f1cad54ba-Supplemental.zip]

## A Technical proofs

**Proposition 5** (Filling functional space). *Fix  $r$  and suppose  $\mathbf{d} = (d_0, d_1, \dots, d_{h-1}, d_h)$  has a filling functional variety  $\mathcal{V}_{\mathbf{d},r}$ . Then the architecture  $\mathbf{d}' = (d_0, 2d_1, \dots, 2d_{h-1}, d_h)$  has a filling functional space, i.e.,  $\mathcal{F}_{\mathbf{d}',r} = \text{Sym}_{r,h-1}(\mathbb{R}^{d_0})^{d_h}$ .*

*Proof.* We mimic the proof of Theorem 1 in [5]. As  $\mathcal{F}_{\mathbf{d},r}$  is thick, equivalently  $\mathcal{F}_{\mathbf{d},r}$  contains some Euclidean open ball  $B \subset \text{Sym}_{r,h-1}(\mathbb{R}^{d_0})^{d_h}$  (see Chevalley’s theorem [18]). But given any point  $p \in \text{Sym}_{r,h-1}(\mathbb{R}^{d_0})^{d_h}$ , we may write  $p = \lambda_1 p_1 + \lambda_2 p_2$  for some  $p_1, p_2 \in B$  and  $\lambda_1, \lambda_2 \in \mathbb{R}$ . Thus in the architecture  $\mathbf{d}'$ , we may set the “top half” of weights to represent  $p_1$ , the “bottom half” to represent  $p_2$ , and so scaling  $W_h$  appropriately, all together the network represents  $\lambda_1 p_1 + \lambda_2 p_2$ .  $\square$

**Proposition 6.** *If the closure of a set  $C \subset \mathbb{R}^n$  is not convex, then there exists a convex function  $f$  on  $\mathbb{R}^n$  whose restriction to  $C$  has arbitrarily “bad” local minima (that is, there exist local minima whose value is arbitrarily larger than that of a global minimum).*

*Proof.* We write  $cl(C)$  for the closure of  $C$ . Let  $L \subset \mathbb{R}^n$  a line that intersects  $cl(C)$  in (at least) two closed disjoint intervals  $L \cap cl(C) \supset I_1 \cup I_2$ . Such line always exists because  $cl(C)$  is not convex. It is easy to construct a convex function  $f : \mathbb{R}^n \rightarrow \mathbb{R} \cup \{+\infty\}$  that is  $+\infty$  outside of  $L$  and has (arbitrarily) different minima when restricted to  $I_1, I_2$ : this amounts to constructing a convex function  $\tilde{f} : \mathbb{R} \rightarrow \mathbb{R}$  with assigned minima on disjoint closed intervals.  $\square$

**Proposition 7.** *If a functional space  $\mathcal{F}_{\mathbf{d},r}$  is not thick, then it is not convex.*

*Proof.* It is enough to argue that  $\mathcal{F}_{\mathbf{d},r}$  does not lie on a linear subspace (i.e., that its affine hull is the whole ambient space). Indeed, because  $\mathcal{F}_{\mathbf{d},r}$  has zero-measure, this implies that it cannot coincide with its convex hull. To show the claim, we observe that  $\mathcal{F}_{\mathbf{d},r}$  always contains all vectors of polynomials of the form  $q_i(\ell) = [0, \dots, 0, \ell^{r^{h-1}}, 0, \dots, 0]^T \in \text{Sym}_{r,h-1}(\mathbb{R}^{d_0})^{d_h}$ , where  $\ell$  is a linear form in  $d_0$  variables (this follows by induction on  $h$ ). The vectors  $q_i(\ell)$  span the whole ambient space, because any polynomial can be written as a linear combination of powers of linear forms.  $\square$

**Lemma 8.** *A shallow architecture  $\mathbf{d} = (d_0, d_1, 1)$  is filling for the activation degree  $r$  if and only if every symmetric tensor  $T \in \text{Sym}_r(\mathbb{R}^{d_0})$  has rank at most  $d_1$ .*

*Proof.* This is clear as the network outputs  $\Phi(W_2, W_1) = \sum_{i=1}^{d_1} w_{21i} W_1(i, :)^{\otimes r} \in \text{Sym}_r(\mathbb{R}^{d_0})$ .  $\square$

**Theorem 10** (Bound on filling widths). *Suppose  $\mathbf{d} = (d_0, d_1, \dots, d_h)$  and  $r \geq 2$  satisfy*

$$d_{h-i} \geq \min \left( d_h \cdot r^{i(d_0-1)}, \binom{r^{h-i} + d_0 - 1}{r^{h-i}} \right)$$

*for each  $i = 1, \dots, h-1$ . Then the functional variety  $\mathcal{V}_{\mathbf{d},r}$  is filling.*

*Proof.* It is equivalent to show that the network map with scalars extended to  $\mathbb{C}$  (i.e., allowing complex weights), denoted  $\Phi_{\mathbf{d},r} \otimes \mathbb{C} : \mathbb{C}^{d_0} \rightarrow \text{Sym}_{r,h-1}(\mathbb{C}^{d_0})^{d_h}$ , has full-measure image. For this, we use induction on  $h$ . The key input is Theorem 4 of [16], which states generic homogeneous polynomials over  $\mathbb{C}$  of degree  $rs$  in  $d$  variables can be written as a sum of  $\leq r^{d-1}$  many  $r$ -th powers of degree  $s$  polynomials over  $\mathbb{C}$ , when  $r \geq 2$ .

The base case  $h = 1$  is trivial. Thus assume  $h > 1$  and that the image has full measure for  $h-1$ . If  $d_{h-1} \geq \binom{r^{h-1} + d_0 - 1}{r^{h-1}}$ , then for generic  $W_{h-1}, \dots, W_1$ , the entries of  $\rho_r W_{h-1} \dots \rho_r W_1 x$  form a vector space basis of  $\text{Sym}_{r,h-1}(\mathbb{C}^{d_0})$ , so the image of  $\Phi_{\mathbf{d},r} \otimes \mathbb{C}$  is filling. On the other hand if  $d_{h-1} \geq d_h \cdot r^{d_0-1}$ , then the image of  $\Phi_{\mathbf{d},r} \otimes \mathbb{C}$  is full measure by [16] and the inductive hypothesis.  $\square$

**Lemma 11.** *For all  $\theta \in \mathbb{R}^{d_\theta}$ , the rank of the Jacobian matrix  $\text{Jac } \Phi_{\mathbf{d},r}(\theta)$  is at most the dimension of the variety  $\mathcal{V}_{\mathbf{d},r}$ . Furthermore, there is equality for almost all  $\theta$  (i.e., for a non-empty Zariski-open subset of  $\mathbb{R}^{d_\theta}$ ).*

*Proof.* We note entries of  $\text{Jac } \Phi_{\mathbf{d},r}(\theta)$  are polynomials in  $\theta$ , thus minors of  $\text{Jac } \Phi_{\mathbf{d},r}(\theta)$  are polynomials in  $\theta$ , so  $\text{Jac } \Phi_{\mathbf{d},r}(\theta)$  has a Zariski-generic rank (the largest size of minor that is a nonzero polynomial), which is also the maximum rank of  $\text{Jac } \Phi_{\mathbf{d},r}(\theta)$ . By basic algebraic geometry, this is the dimension of  $\mathcal{V}_{\mathbf{d},r}$  (see “generic submersiveness” of algebraic maps in characteristic 0 [18]).  $\square$

**Lemma 13** (Multi-homogeneity). *For arbitrary invertible diagonal matrices  $D_i \in \mathbb{R}^{d_i \times d_i}$  and permutation matrices  $P_i \in \mathbb{Z}^{d_i \times d_i}$  ( $i = 1, \dots, h-1$ ), the map  $\Phi_{\mathbf{d},r}$  returns the same output under the replacement:*

$$\begin{aligned} W_1 &\leftarrow P_1 D_1 W_1 \\ W_2 &\leftarrow P_2 D_2 W_2 D_1^{-r} P_1^T \\ W_3 &\leftarrow P_3 D_3 W_3 D_2^{-r} P_2^T \\ &\vdots \\ W_h &\leftarrow W_h D_{h-1}^{-r} P_{h-1}^T. \end{aligned}$$

*Thus the dimension of a generic fiber (pre-image) of  $\Phi_{\mathbf{d},r}$  is at least  $\sum_{i=1}^{h-1} d_i$ .*

*Proof.* This is from the multi-homogeneity of the  $r$ -th power activation  $\rho_r$  by substituting.  $\square$

**Theorem 14** (Naive bound and equality for high activation degree). *If  $\mathbf{d} = (d_0, \dots, d_h)$ , then*

$$\dim \mathcal{V}_{\mathbf{d},r} \leq \min \left( d_h + \sum_{i=1}^h (d_{i-1} - 1) d_i, d_h \binom{d_0 + r^{h-1} - 1}{r^{h-1}} \right). \quad (5)$$

*Conditional on Conjecture [16] for fixed  $\mathbf{d}$  satisfying  $d_i > 1$  ( $i = 1, \dots, h-1$ ), there exists  $\tilde{r} = \tilde{r}(\mathbf{d})$  such that whenever  $r > \tilde{r}$ , we have an equality in (5). Unconditionally, for fixed  $\mathbf{d}$  satisfying  $d_i > 1$  ( $i = 1, \dots, h-1$ ), there exist infinitely many  $(r_{h-1}, r_{h-2}, \dots, r_1)$  such that the image of  $(W_h, \dots, W_1) \mapsto W_h \rho_{r_{h-1}} W_{h-1} \rho_{r_{h-2}} \dots \rho_1 W_1 x$  has dimension  $d_h + \sum_i (d_{i-1} - 1) d_i$ .*

*Proof.* We know the dimension of  $\mathcal{V}_{\mathbf{d},r}$  equals the dimension of the domain of  $\Phi_{\mathbf{d},r}$  minus the dimension of a generic fiber of  $\Phi_{\mathbf{d},r}$  (see generic freeness [15]). Thus by Lemma [13],  $\dim \mathcal{V}_{\mathbf{d},r} \leq \sum_{i=1}^h d_{i-1} d_i - \sum_{i=1}^{h-1} d_i = d_h + \sum_{i=1}^h (d_{i-1} - 1) d_i$ . At the same time, the dimension of  $\mathcal{V}_{\mathbf{d},r}$  is at most that of its ambient space  $\text{Sym}_{r^{h-1}}(\mathbb{R}^{d_0})^{d_h}$ . Combining produces the bound (10).

For the next statement, we temporarily assume Conjecture [16]. We shall prove by induction on  $h$  the stronger result that for  $r \gg 0$  the generic fibers of  $\Phi_{\mathbf{d},r}$  are precisely as described in Lemma [13] (and no more). The base case  $h = 1$  is trivial. Thus assume  $h > 1$  and that for  $h-1$  the generic fiber is exactly as in Lemma [13], whenever  $r > \tilde{r}_1 = \tilde{r}_1(d_0, \dots, d_{h-1})$ . For the induction step, we let  $\tilde{r}_2 = \tilde{r}_2(d_0, d_{h-1})$  be a threshold which works in Conjecture [16] for  $d = d_0$  and  $k = 2d_{h-1}$ , and then we set  $\tilde{r}_3 = \tilde{r}_3(d_0, \dots, d_h) = \max(\tilde{r}_1, \tilde{r}_2)$ . Now with fixed generic weights  $W_h, \dots, W_1$ , we consider any other weights  $\tilde{W}_h, \dots, \tilde{W}_1$  satisfying

$$W_h \rho_r W_{h-1} \dots \rho_r W_1 x = \tilde{W}_h \rho_r \tilde{W}_{h-1} \dots \rho_r \tilde{W}_1 x \quad (6)$$

for  $r > \tilde{r}_3$ . Write  $[p_{\theta 1} \dots p_{\theta d_{h-1}}]$  for the output of the LHS in (6) at depth  $h-1$ , and similarly  $[\tilde{p}_{\theta 1} \dots \tilde{p}_{\theta d_{h-1}}]$  for the RHS. By genericity and  $d_i > 1$ , the polynomials  $p_{\theta i}$  are pairwise linearly independent. Comparing the top outputs at depth  $h$  in (6), we get two decompositions of type (4):

$$w_{h11} p_{\theta 1}^r + \dots + w_{h1d_{h-1}} p_{\theta d_{h-1}}^r = \tilde{w}_{h11} \tilde{p}_{\theta 1}^r + \dots + \tilde{w}_{h1d_{h-1}} \tilde{p}_{\theta d_{h-1}}^r. \quad (7)$$

Since  $r > \tilde{r}_2$ , by Conjecture [16] there must be two linearly dependent summands in (7). Permuting as necessary we may assume these are the first two terms on both sides. Scaling as necessary we may assume  $p_{\theta 1} = \tilde{p}_{\theta 1}$ , and then subtract  $\tilde{w}_{h11} \tilde{p}_{\theta 1}^r$  from (7) to get:

$$(w_{h11} - \tilde{w}_{h11}) p_{\theta 1}^r + \dots + w_{h1d_{h-1}} p_{\theta d_{h-1}}^r = \tilde{w}_{h12} \tilde{p}_{\theta 2}^r + \dots + \tilde{w}_{h1d_{h-1}} \tilde{p}_{\theta d_{h-1}}^r. \quad (8)$$

Invoking Conjecture [16] again, we may remove another summand from the RHS, so on until the RHS is 0. Then each individual summand in the LHS must be 0 too, by pairwise linear independence and Conjecture [16] once more. We have argued that (up to scales and permutation) it must hold  $[p_{\theta 1} \dots p_{\theta d_{h-1}}] = [\tilde{p}_{\theta 1} \dots \tilde{p}_{\theta d_{h-1}}]$  and  $W_h(1, :) = \tilde{W}_h(1, :)$ . Comparing other outputs at depth  $h$  in (6) gives  $W_h = \tilde{W}_h$  (up to scales and permutation). Thus by the inductive hypothesis, the fiber through  $(W_h, \dots, W_1)$  is as in Lemma [13] and no more. This completes the induction.

For the unconditional result with differing degrees per layer, the argument runs closely along similar lines, but it relies on Proposition [15] in place of Conjecture [16]. For brevity, the details are omitted.  $\square$

**Proposition 15.** *Given positive integers  $d, k, s$ , there exists  $\tilde{r} = \tilde{r}(d, k, s)$  with the following property. Whenever  $p_1, \dots, p_k \in \mathbb{R}[x_1, \dots, x_d]$  are  $k$  homogeneous polynomials of the same degree  $s$  in  $d$  variables, no two of which are linearly dependent, then  $p_1^r, \dots, p_k^r$  are linearly independent if  $r > \tilde{r}$ .*

*Proof.* It is shown in [4] (via Wronskian and Vandermonde determinants) that for any particular  $p_1, \dots, p_k$ , no two of which are linearly dependent, there exists  $\tilde{r} = \tilde{r}(p_1, \dots, p_k)$  such that  $p_1^r, \dots, p_k^r$  if  $r > \tilde{r}$ . The dependence on particular  $p_1, \dots, p_k$  can be removed as follows.

Let  $U \subset \text{Sym}_s(\mathbb{R}^d)^k$  be the set of  $k$ -tuples, no two entries of which are linearly dependent. So  $U$  is Zariski-open, described by the non-vanishing of  $2 \times 2$  minors. Further let  $U_r \subseteq U$  be the subset of  $k$ -tuples whose  $r$ -th powers are linearly independent, similarly Zariski-open. Consider the chain of inclusions  $U_1 \subseteq U_1 \cup U_2 \subseteq U_1 \cup U_2 \cup U_3 \subseteq \dots$ . By [4], the union of this chain equals  $U$ . Thus by Noetherianity of affine varieties, there exists  $R$  with  $\cup_{r=1}^R U_r = U$  [15]. Now  $\tilde{r} = R!$  works.  $\square$

**Proposition 17 (Recursive Bound).** *For all  $(d_0, \dots, d_k, \dots, d_h)$  and  $r$ , we have:*

$$\dim \mathcal{V}_{(d_0, \dots, d_h), r} \leq \dim \mathcal{V}_{(d_0, \dots, d_k), r} + \dim \mathcal{V}_{(d_k, \dots, d_h), r} - d_k.$$

*Proof.* This bound encapsulates the bracketing:

$$(W_h \rho_r W_{h-1} \dots W_{k+1}) \rho_r (W_k \rho_r W_{k-1} \dots W_1 x). \quad (9)$$

More formally, the network map  $\Phi_{(d_0, \dots, d_h), r}$  factors as:

$$\mathbb{R}^{d_\theta} \longrightarrow \text{Sym}_{r, h-k-1}(\mathbb{R}^{d_k})^{d_h} \times \text{Sym}_{r, k-1}(\mathbb{R}^{d_0})^{d_k} \longrightarrow \text{Sym}_{r, h-1}(\mathbb{R}^{d_0})^{d_h} \quad (10)$$

by first sending  $(W_h, \dots, W_1)$  to the pair of bracketed terms in (9) and then the pair to the composite in (9). The closure of the image of the first map in (10) is  $\mathcal{V}_{(d_0, \dots, d_h), r} \times \mathcal{V}_{(d_k, \dots, d_h), r}$ . On the other hand, the second map in (10) has  $\geq d_k$ -dimensional generic fibers, by multiplying with a diagonal matrix  $D_k \in \mathbb{R}^{d_k \times d_k}$ . Combining these facts gives the result.  $\square$

**Theorem 19 (Bottlenecks).** *If  $r \geq 2, d_0 \geq 2, i \geq 1$ , then  $d_i = 2d_0 - 2$  is an asymptotic bottleneck. Moreover conditional on Conjecture 2 in [28], then  $d_i = 2d_0$  is not an asymptotic bottleneck.*

*Proof.* We first point out that Proposition [17] gives an elementary proof  $d_i = d_0 - 1$  is an asymptotic bottleneck. This is because as  $h$  grows the ambient dimension grows like  $O(d_h \cdot d_0^{r^{h-1}})$ , while the RHS bound grows like  $O(d_h \cdot d_i^{r^{h-i-1}})$ , so if  $d_i < d_0$  then  $\mathcal{V}_{d, r}$  cannot fill for  $h \gg 0$ .

To gain a factor of 2 in the bottleneck bound, we start by writing  $[p_{\theta 1} \dots p_{\theta d_i}]^T$  for the output polynomials at depth  $i$ , that is, for  $W_i \rho_r W_{i-1} \dots \rho_r W_1 x$ . Fixing  $\theta$ , we consider  $A_\theta := \mathbb{R}[p_{\theta 1}^r, \dots, p_{\theta d_i}^r]$ , a subalgebra of the Veronese ring  $V_{d_0, r^i} := \mathbb{R}[x_1^{\alpha_1} \dots x_{d_0}^{\alpha_{d_0}} : \sum_{j=1}^{d_0} \alpha_j = r^i]$ . The key idea is to compare the Hilbert polynomials of  $A_\theta$  and of  $V_{d_0, r^i}$  [6]. If the Hilbert polynomials differ in any non-constant terms, this means the dimension of the degree  $D$  piece of  $A_\theta$  minus that of  $V_{d_0, r^i}$  diverges to  $-\infty$  as  $D$  goes to  $\infty$ . At the same time, however we vary weights  $W_{i+1}, \dots, W_h$  (keeping  $\theta = W_1, \dots, W_i$  fixed), the output polynomials  $\Phi_{d, r}$  remain in the algebra  $A_\theta$ . Additionally, for varying  $\theta$  and  $d_1, \dots, d_{i-1}$ , the possible  $d_i$ -vectors of degree  $r^i$  polynomials in  $d_0$  variables,  $[p_{\theta 1} \dots p_{\theta d_i}]^T$ , comprise a bounded-dimensional variety. The upshot is that if it need always be the case (based on  $r, d_0, i, d_i$ ) that the Hilbert polynomials of  $A_\theta$  and  $V_{d_0, r^i}$  have non-constant difference, then  $d_i$  must be an asymptotic bottleneck. Thus it suffices to check the Hilbert polynomial property holds for all  $\theta$  if  $d_i = 2d_0 - 2$ . To this end, we derived the following general result:

**Claim.** *Given integers  $d \geq 2$  and  $s \geq 2$ . Then whenever  $p_1, \dots, p_{2d-2} \in \mathbb{R}[x_1, \dots, x_d]$  are  $2d-2$  homogeneous polynomials of the same degree  $s$  in  $d$  variables, the algebra  $\mathbb{R}[p_1, \dots, p_{2d-2}]$  and the Veronese algebra  $V_{d,s}$  have Hilbert polynomials with non-constant difference.*

*Proof of claim.* First, it suffices to check the claim for generic  $p_i$ . Second, the difference in Hilbert polynomials identifies with the Hilbert polynomial of the *sheaf*  $\mathcal{G} = \text{coker}(\mathcal{O}_Y \rightarrow \pi_* \mathcal{O}_X)$  [18]. Here  $X := \mathbb{V}_{d,s} \subset \mathbb{P}^{N_{s,d}-1}$  ( $N_{s,d} = \binom{d+s-1}{s}$ ) is the *projective Veronese variety*, the linear projection  $\pi : \mathbb{P}^{N_{s,d}-1} \dashrightarrow \mathbb{P}^{2d-3}$  corresponds to  $(p_1, \dots, p_{2d-2})$ , and finally  $Y := \overline{\pi(X)}$  is the closure of  $X$  projected by  $\pi$ . By general facts, the degree of the Hilbert polynomial of  $\mathcal{G}$  equals the projective dimension of the support of  $\mathcal{G}$ , and this support is the *branch locus* of  $\pi|_X$ . Now let  $L \subset \mathbb{P}^{N_{s,d}-1}$  denote the base locus (kernel) of  $\pi$ , a linear subspace of projective dimension  $N_{s,d} - 2d + 1$ . If  $d \geq 3$ ,  $s \geq 3$ , then  $L \cap \text{Sec}(X)$  is a curve, where  $\text{Sec}$  denotes the line *secant variety* [22] ( $d = 2$  or  $s = 2$  are omitted simple special cases). Each point on  $L \cap \text{Sec}(X)$  lies on a line through two points on  $X$ ; these points map to the same image under  $\pi$ , giving a point in the branch locus of  $\pi|_X$ . It follows the branch locus is a curve, thus the degree of the Hilbert polynomial of  $\mathcal{G}$  is  $1 > 0$ , as desired.  $\square$

By the preceding discussion, the claim establishes  $d_i = 2d_0 - 2$  is an asymptotic bottleneck.

For the statement when  $d_i = 2d_0$ , let us temporarily assume Conjecture 2 in [28]. This means  $\mathbb{R}[p_{\theta 1}^r, \dots, p_{\theta 2d_0}^r]$  has the same Hilbert function as  $\mathbb{R}[P_1, \dots, P_{2d_0}]$  for generic forms  $P_i$  of degree  $r^i$ , provided  $p_{\theta i}$  are generic forms of degree  $r^{i-1}$ . Reasoning as for the claim,  $\mathbb{R}[P_1, \dots, P_{2d_0}]$  has the same Hilbert polynomial as the Veronese ring  $V_{d_0, r^i}$ . Thus if we choose  $(d_1, \dots, d_{i-1})$  so that  $(d_0, \dots, d_i)$  is filling, then it follows we can choose  $h \gg 0$  and  $(d_{i+1}, \dots, d_h)$  so that  $(d_0, \dots, d_h)$  is filling. In other words,  $d_i = 2d_0$  is not an asymptotic bottleneck.  $\square$
